1 **Prediction of broad chemical toxicities using**  
2 **induced pluripotent stem cells and gene networks**  
3 **by transfer learning from embryonic stem cell**  
4 **data**

5

6 **Authors**

7 Junko Yamane<sup>1</sup>, Takumi Wada<sup>1</sup>, Hironori Otsuki<sup>2</sup>, Koji Inomata<sup>2</sup>, Mutsumi Suzuki<sup>2</sup>,  
8 Tomoka Hisaki<sup>3</sup>, Shuichi Sekine<sup>3</sup>, Hirokazu Kouzuki<sup>3</sup>, Kenta Kobayashi<sup>1</sup>, Hideko Sone<sup>4</sup>,  
9 Jun K. Yamashita<sup>1</sup>, Mitsujiro Osawa<sup>1</sup>, Megumu K. Saito<sup>1</sup>, and Wataru Fujibuchi<sup>1\*</sup>

10

11 **Affiliations**

12 <sup>1</sup>Center for iPS Cell Research and Application (CiRA), Kyoto University, 53  
13 Kawahara-cho, Shogoin, Sakyo-ku, Kyoto 606-8507, Japan

14 <sup>2</sup>Toxicological Research Laboratories, Translational Research Unit, R&D Division,  
15 Kyowa Kirin Co., Ltd., 1188 Shimotogari, Nagaizumi-cho, Sunto-gun, Shizuoka  
16 411-8731, Japan

17 <sup>3</sup>MIRAI Technology Institute, Shiseido Co., Ltd., 1-2-11, Takashima, Nishi-ku,  
18 Yokohama-shi, Kanagawa 220-0011, Japan

19 <sup>4</sup>Environmental Health and Prevention Research Unit, Yokohama University of  
20 Pharmacy, 601 Matano-cho, Totsuka-ku, Yokohama-shi, Kanagawa 245-0066, Japan

1

2 **Additional Footnotes**

3 Present address:

4

5 **Contact**

6 Wataru Fujibuchi\*

7 Address: Center for iPS Cell Research and Application (CiRA), Kyoto University, 53

8 Kawahara-cho, Shogoin, Sakyo-ku, Kyoto 606-8507, Japan

9 E-mail: [fujibuchi-g@cira.kyoto-u.ac.jp](mailto:fujibuchi-g@cira.kyoto-u.ac.jp)

10 Tel: +81-75-366-7012

11

## 1 **SUMMARY**

2 The assessment of toxic chemicals using animals has limited applicability to humans.  
3 Moreover, from the perspective of animal protection, effective alternatives are also  
4 desired. Previously, we developed a method that combines developmental toxicity  
5 testing based on undifferentiated human embryonic stem (ES) cells (KhES-3) and gene  
6 networks. We showed that  $\geq 95\%$  accurate predictions could be achieved for  
7 neurotoxins, genotoxic carcinogens, and non-genotoxic carcinogens. Here, we expanded  
8 this method to predict broad toxicities and predicted the toxicity of 24 chemicals in six  
9 categories (neurotoxins, cardiotoxins, hepatotoxins, nephrotoxins [glomerular  
10 nephrotoxins/tubular nephrotoxins], and non-genotoxic carcinogens) and achieved high  
11 prediction accuracy (AUC = 0.90–1.00) in all categories. Moreover, to develop a testing  
12 system with fewer ethical issues, we screened for an induced pluripotent stem (iPS) cell  
13 line on the basis of cytotoxic sensitivity and used this line to predict toxicity in the six  
14 categories based on the gene networks of iPS cells using transfer learning from the ES  
15 cell gene networks. We successfully predicted toxicities in four toxin categories  
16 (neurotoxins, hepatotoxins, glomerular nephrotoxins, and non-genotoxic carcinogens) at  
17 high accuracy (AUC = 0.82–0.99). These results demonstrate that the prediction of  
18 chemical toxicity is possible even with iPS cells by transfer learning once a gene  
19 expression database has been developed from an ES cell line. This method holds  
20 promise for tailor-made safety evaluations using individual iPS cells.

1

## 2 INTRODUCTION

3 To date, chemical toxicity studies have been primarily conducted by *in vitro* testing in  
4 cultured human cancer cell lines or in animals such as mouse, rat, and rabbit. However,  
5 because these methods differ from testing in "normal" human cells, their applications  
6 are limited<sup>1</sup>. In addition, the use of animals has become a major issue from the  
7 standpoint of animal welfare; in 2019, the U.S. Environmental Protection Agency  
8 announced that research studies using mammals as well as funding for mammal studies  
9 would be cut by 30% by 2025 and abolished by 2035<sup>2</sup>.

10 The embryonic stem cell test (EST) reported by Scholz et al. was the first to  
11 examine embryotoxicity *in vitro* using mouse fibroblasts, embryonic stem (ES) cells,  
12 and cardiomyocytes differentiated from ES cells; such developmental toxicity testing  
13 was previously performed only in animals<sup>3,4</sup>. Later, this method was approved as a  
14 scientifically valid alternative by the European Centre for the Validation of Alternative  
15 Methods (ECVAM) (<https://tsar.jrc.ec.europa.eu/test-method/tm1999-01>). However, the  
16 EST uses mouse cells, and species-specific differences must be clarified in order to use  
17 this approach to evaluate toxicity in human. Subsequently, another research group  
18 reported that in an EST based on a human cell system (hEST), changes in the  
19 expression of homologous neurodevelopmental genes were similar to those observed in  
20 the mouse system<sup>5</sup>.

1           In 2012, the U.S. Defense Advanced Research Projects Agency (DARPA) and  
2 the NIH invested a huge sum on a national project to promote the development of  
3 biomimetic systems, leading to rapid progress in the field<sup>6</sup>. These systems, which mimic  
4 the (adult) human body and are constructed by filling tissues created in individual  
5 compartments with culture fluid and connecting them together, are expected to be used  
6 in human toxicity testing systems as an alternative to animals. Currently, however, very  
7 little progress has been made in adapting these systems for application in developmental  
8 toxicity testing, and no evaluation method has been established for determining how  
9 accurately these systems mimic the function of the normal human body<sup>7</sup>. Realizing the  
10 practical application of these systems as high-throughput toxicity screening tools is  
11 likely to take several years.

12           For many years, the prediction of chemical toxicity has been carried out using  
13 a method based on the physicochemical parameters of the chemicals, referred to as the  
14 quantitative structure–activity relationship (QSAR)<sup>8</sup>. However, there is a limit to the  
15 predictive ability of QSAR. One reason is that the mechanism that actually induces  
16 toxic responses resides within the cell, so information about the chemical alone cannot  
17 predict such responses. In this regard, it should be possible to detect toxicity more  
18 accurately by obtaining information about the variation in gene expressions in cells, the  
19 so-called 'hardware' that mediates responses to chemicals. In addition, as stem cells  
20 differentiate, only the genes essential for that lineage is expressed and conserved

1 through DNA methylation<sup>9</sup>, whereas in pluripotent stem cells, a very large number of  
2 genes are expressed, including transporters and transcription factors; consequently,  
3 pluripotent cells are superior to differentiated cells as a tool for comprehensively  
4 detecting toxic chemicals. In light of these considerations, we developed hEST-GN  
5 (human embryonic stem cell test with gene networks), a prediction method that uses  
6 information on feature gene networks based on massive gene expression datasets  
7 obtained by exposing human ES cells to toxic chemicals as input data for machine  
8 learning. Using this method, we achieved highly accurate predictions of developmental  
9 toxicity categories<sup>10</sup>.

10 In this study, we expanded the hEST-GN and found that the prediction of 24  
11 toxic chemicals in broad toxicity categories, including adult toxicity, can be achieved  
12 with high accuracy. Furthermore, by selecting induced pluripotent stem (iPS) cells,  
13 which can be used as an alternative to ES cells in toxicity testing, and using a gene  
14 expression database created from ES cells, we were able to develop a method that can  
15 predict chemical toxicity using iPS cell data via transfer learning; this approach  
16 ameliorates the ethical issues related to ES cells. If this method could be further  
17 improved, it is likely that it could contribute to the development of tailor-made,  
18 individualized toxicity assessment/prevention using individual iPS cells, which would  
19 have enormous clinical value.

20

## 1    **RESULTS**

### 2    **Development of an hEST-GN library for 24 chemicals and prediction using iPS**

3    A schematic of the chemical assay is shown in **Fig. 1a**. The human ES cell line KhES-3  
4    was exposed to a total of 24 chemicals in six toxicity categories [neurotoxins,  
5    hepatotoxins, cardiotoxins, two types of nephrotoxins (glomerular nephrotoxins and  
6    tubular nephrotoxins), and non-genotoxic carcinogens] at six concentrations, including  
7    vehicle (solvent) alone. The chemicals were carefully assigned to the toxicity categories  
8    by referring to previous reports (**Table 1**). Gene expression data were obtained by  
9    RNA-seq at two time points, 24 and 48 h, after exposure. At each time point, a principal  
10   component analysis (PCA) was performed using transcription factor genes, and a total  
11   of 20 genes from the top five PCs were extracted as feature genes. Using these genes,  
12   gene network libraries were created for each of the 24 chemicals using the Graphical  
13   Gaussian Model (GGM)<sup>11</sup>. Similarly, the screened iPS cells were subjected to RT-qPCR  
14   to obtain gene expression data for the same 20 genes and create gene network libraries.  
15   Next, using ES cell library labels, a chemical toxicity prediction system trained by both  
16   libraries from ES and iPS cells was developed via transfer learning<sup>12</sup> using support  
17   vector machines (SVMs)<sup>13</sup>.

18

### 19   **Gene expression response database of ES cells for 24 chemicals**

1 To obtain the largest amount of data about the expression of genes that were perturbed  
2 by the 24 chemicals, ES cells need to be exposed to chemicals at the maximum  
3 concentration that does not cause an excessive degree of cell death. To this end, we first  
4 performed ATP assays and then plotted regression curves to calculate inhibitory  
5 concentrations (ICs) by carrying out serial dilutions of stock solutions containing the  
6 maximum soluble concentrations of the 24 chemicals. ICs in the range of 0.1% to 50%,  
7 at which cell death begins to be observed, were set as the maximum exposure  
8 concentration (**Table S1, Fig. S1**). The estimated IC<sub>50</sub> and 95% confidence interval  
9 (CI) for each chemical are shown in **Fig. 1b (Table S2)**. Serial dilutions were carried  
10 out, with the maximum exposure concentration set as 1/1 to obtain 1/2, 1/4, 1/8, and  
11 1/16 dilutions, and a six-step exposure including vehicle alone was performed and  
12 repeated twice, yielding a total of  $6 \times 2 = 12$  samples for each chemical. We collected  
13 RNA 24 and 48 h after exposure to the 24 chemicals, performed transcriptome analysis,  
14 and generated gene expression datasets for a total of  $12 \times 24 \times 2 = 576$  samples.

15 To examine the characteristics of the 24 chemicals at the level of differentially  
16 expressed genes (DEGs), we selected transcription factor-related genes (GO: 0006351)  
17 from the 576 datasets (4,032 genes). After log-normalization, batch effect elimination,  
18 and repeat merging, we generated DEG sets for which differences between each  
19 exposure data and vehicle values were significant ( $FDR < 0.01$  and  $\log_2|FC| > 1$ ) and  
20 presented them in a heatmap (**Fig. 1c, Fig. S2, S3**). According to this analysis, the



1 number of DEGs was higher at 48 h than at 24 h for all concentrations, and over time,  
2 more genes were up- or down-regulated due to exposure to the chemicals. At both 24  
3 and 48 h, valproic acid, a strong neurodevelopmental toxicant, elicited gene expression  
4 patterns that were clearly distinct from those of the other chemicals. Similarly,  
5 lithocholic acid, a mammalian bile acid and well-known carcinogen, yielded distinct  
6 expression patterns.

7

## 8 **Construction of gene networks of the 24 chemicals by the Graphical Gaussian** 9 **Model (GGM)**

10 To obtain feature genes used in the prediction, we performed PCA on the basis of the  
11 exposure data of each transcription factor gene, expressed as a log-fold-change (LFC)  
12 in expression relative to vehicle after log-normalization and batch effect elimination.  
13 There were 3,200 genes for the 24-h samples and 3,255 genes for the 48-h samples. For  
14 both exposure times, it was difficult to clearly separate the chemicals by the toxicity  
15 categories using two-dimensional PCA (**Fig. 1d**). Accordingly, we selected two genes  
16 with maximum positive and negative loading values, which were considered to  
17 contribute the most to the first to fifth PCs; at each time point, 20 genes were selected as  
18 feature genes (**Table S3**). Among the 20 selected genes in each group, only *ACTR3*<sup>14</sup>,  
19 which has been implicated in cell shape and motility, was common.

1           Using the 20 selected genes, we estimated sparse gene networks based on  
2 GGMs using an L1 graphical lasso for each chemical at each time point (i.e., 24 and 48 h)  
3 **(Fig. 2a, Fig. S4, Fig. S5)**. The figures illustrate the estimated 190 partial correlation  
4 coefficients incorporated into the gene networks; edges with positive partial correlation  
5 values between two genes are shown in green, and edges with negative values are shown  
6 in red; the thickness, distance, and arrangement of the edges correspond to the degree of  
7 correlation between the two genes. Because these genes were obtained from the top five  
8 PCs that maximize the dispersion of the 24 chemicals using PCA, the estimated GGMs  
9 that describe the networks of all 20 genes differed considerably among chemicals, and it  
10 was difficult to classify the chemicals simply based on the network patterns as a whole.  
11 Therefore, for actual predictions, we decomposed the networks into their constituent  
12 edges rather than using them as a whole and used those with higher discriminative  
13 potential for training data as features. In other words, the partial correlation coefficients  
14 of the edges that are characteristic of the respective toxicity categories contributed to the  
15 SVM discrimination.

16

### 17 **Prediction of six toxicity categories using KhES-3 cells and the GGM network**

18 Using the 190 partial correlation coefficients in the GGM as input data, we predicted the  
19 toxicities of the 24 toxic chemicals in six categories using SVMs with  
20 leave-one-out-cross-validation (LOOCV). For the predictions, we followed the

1 procedures described in a previous report on hEST-GN<sup>10</sup> using four kernels (linear,  
2 polynomial, RBF, and maximum entropy) and increased the number of top features  
3 ranked by a t-test from 1 to 190. We also performed the prediction with the raw LFC  
4 values of the 3,200 (24 h) and 3,255 (48 h) transcription factor genes at each of the five  
5 concentrations relative to the vehicle-only expression. To compare the predictive  
6 accuracy, the same number of input data used for the GGM (i.e., up to 190 genes) was  
7 used as features. Predictions with the raw LFC values did not achieve a significantly  
8 higher prediction performance than the mean predictions using 10 uniform random  
9 numbers. On the other hand, in the prediction based on the GGM, the AUC values were  $\geq$   
10 0.90 for chemicals in all toxicity categories, and because the prediction accuracy or AUC  
11 values were significantly high ( $p < 0.05$ ), we concluded that prediction with high  
12 performance is possible. Predictions were performed separately at 24 and 48 h, but  
13 depending on the chemical, the time point at which a higher prediction accuracy could be  
14 obtained differed; thus, neither time point was considered particularly superior in terms  
15 of yielding a better prediction. Overall, these results demonstrated that hEST-GN based  
16 on ES cell gene networks allows for the prediction of not only developmental toxicity but  
17 also broad toxicity categories including adult toxicity.

18 In addition, to compare with predictions based on the QSAR theory, we  
19 generated 5,666 molecular descriptors including 3D descriptors (**Table S4**) and  
20 performed predictions using top 1 to 190 feature genes according to the aforementioned

1 method. None of the six categories, except for tubular nephrotoxin (accuracy of 91.7%),  
2 gave a significantly high prediction result. The results of all predictions are presented  
3 together in a table and as ROC curves (**Table 2, Fig. 2b, Fig. S6**). These results suggest  
4 that chemical toxicity predictions that use the partial correlation coefficients of the GGM  
5 as features can achieve significantly higher accuracy than predictions based on gene  
6 expression values or QSAR. In the GGM-based prediction, the prediction accuracy for  
7 each of the 24 chemicals was examined from the SVM results. This analysis revealed that  
8 with respect to 16 chemicals (acetonylacetone, acrylamide, amitriptyline HCl,  
9 atorvastatin, bucillamine, chlorpheniramine, chlorpromazine, digoxin, doxorubicin,  
10 gentamicin, itraconazole, lithocholic acid, methapyrilene HCl, sunitinib, thioacetamide,  
11 and valproic acid), the prediction accuracy was 100% for all six categories at 24 and 48 h.  
12 On the other hand, for axitinib, cisplatin, and cyclosporin A, the prediction accuracy was  
13 66.6%, suggesting that the prediction of these chemicals is difficult (**Table S5**).

14

### 15 **Pathway analysis of KhES-3 genes following exposure to 24 chemicals**

16 To determine the effects of exposure to chemicals on biological pathways, we performed  
17 a Hallmark pathway analysis by Gene Set Enrichment Analysis (GSEA) using all genes.  
18 When performing this analysis, we divided the samples into high-dose (1/1 and 1/2 doses)  
19 and low-dose (1/8 and 1/16 doses). For hepatotoxins, cardiotoxins, and globular  
20 nephrotoxins, differences were observed in the types of pathways that were induced or

1 suppressed in comparison with other toxic chemicals in the high-dose samples at 24 h  
2 **(Fig. 2c, Fig. S7)**. In addition, the responses of ES cell genes to the toxic chemicals were  
3 diverse and dependent on the type of chemical to which they were exposed and not  
4 limited to specific pathways such as apoptosis. This observation suggests that it is  
5 possible to predict toxicity categories on the basis of perturbed pathways that can be  
6 detected by transcription factors. On the other hand, differences in concentrations or  
7 among categories that may have been present at 48 h were not as pronounced as those at  
8 24 h. However, analyses using available pathways based on human knowledge  
9 accumulated in the past provide limited information. Instead, the computational  
10 extraction of feature genes from the PCA of all genes without bias and predictions based  
11 on their GGM networks are likely to be more effective.

12

### 13 **Selection of iPS cells as an alternative to human ES cells**

14 The results of the present and previous studies suggest that hEST-GN can predict not only  
15 developmental toxicity but also broad toxicity categories with high performance.  
16 However, there are still hurdles to overcome, including ethical issues, before this system  
17 can be generally and widely accepted as a toxicity test. Accordingly, to make iPS cells a  
18 possible alternative to hEST-GN, we performed pre-screening by comparing ATP assays  
19 with ES cells exposed to 20 toxic chemicals across a wide range of categories. As  
20 candidates, we used the top 20 cell lines selected from among Japanese male cell lines<sup>15</sup>

1 derived from healthy individuals, which had been examined and ranked in terms of their  
2 differentiation potential into the three germ layers. For exposure concentration, we  
3 adopted the IC50 that was determined using the KhES-3 cell line and examined the  
4 toxicity response of human iPS cells. Among the candidate cell lines, we selected the top  
5 three cell lines with well-correlated growth rates at IC50 (HPS4138, HPS4234, and  
6 HPS4046) and confirmed the correlation coefficients of the growth rates at IC50 with  
7 KhES-3 using 20 of the 24 toxic chemicals investigated in this study. HPS4138 had the  
8 highest value of 0.94; accordingly, this cell line was used for the predictions as an  
9 alternative to ES cells (**Table S6**).

10

#### 11 **Prediction of chemicals in six toxicity categories using HPS4138 iPS cells**

12 For HPS4138, which was selected by screening, we performed ATP assays with the 24  
13 chemicals (**Fig. S8, Table S7, Table S8**). As in the case of ES cells, the cells were  
14 exposed to vehicle alone or five concentrations obtained by serial dilutions of stock  
15 solutions containing the maximum exposure concentration (i.e., the maximum value  
16 between IC0.1 and IC50 that did not cause an excessive degree of cell death); this  
17 experiment was repeated twice. Gene expression data for 20 genes selected from KhES-3  
18 cells at 24 and 48 h were obtained by qRT-PCR, and GGMs were created for each of the  
19 24 chemicals based on LFC values relative to the vehicle. Partial correlation coefficients  
20 were used for the prediction, as in the case of ES cells. In the prediction, data were created

1 by integrating iPS cell data with ES cell data as well as by transductive transfer learning,  
2 in which toxicity category labels in the ES cell data were used for the learning to allow for  
3 category prediction using iPS cells. Assessment was performed by LOOCV, similarly to  
4 the predictions made using ES cells only. Chemicals in all categories except cardiotoxins  
5 and tubular nephrotoxins yielded AUC values from 0.82 to 0.99, and the accuracy or  
6 AUC was significantly higher than for results obtained with uniform random numbers.  
7 Thus, although this approach was not perfect, the results of the prediction using HPS4138  
8 were very accurate for most toxicity categories (**Table 3**). The summary of toxicity  
9 category predictions for the 24 chemicals using HPS4138 are shown in **Fig. 3**. Prediction  
10 was difficult for butylated HA, but satisfactory for the other chemicals (**Table S9**). These  
11 results demonstrate that if a gene expression database for toxicity responses could be  
12 created with ES cells, chemical toxicity prediction using iPS cells would also be possible  
13 by means of transductive transfer learning. Our findings also raise the possibility of  
14 achieving practical applications of toxicity testing using standardized or individualized  
15 iPS cells in the future. A description of transductive transfer learning is available on our  
16 web site at <https://hipst-gn.stemcellinformatics.org>.

17

18

## 1 **DISCUSSION**

2 Here we presented a proof-of-concept study that enables a toxicity hazard assessment  
3 using human iPS cells and transfer learning based on the transcription factor gene  
4 network libraries made from the gene expression data of human ES cells exposed to 24  
5 chemicals for 6 categories.

6 In this paper, we clarified that i) human ES cells are sufficient to detect not only  
7 developmental toxicities during embryogenesis but also broad toxicity categories such as  
8 adult toxins (neurotoxin, cardiotoxin, hepatotoxin, and glomerular and tubular  
9 nephrotoxins) and non-genotoxic carcinogens; ii) the chemical toxicity prediction using  
10 transcription factor gene networks of human ES cells shows an AUC = 0.90–1.00, which  
11 is significantly more accurate than predictions based on the QSAR theory or from raw  
12 gene expression data; iii) there exist differences in the biological pathways affected by  
13 the toxicity categories, suggesting the mechanisms that underlie the transcription factor  
14 networks that control the pathways may be used to predict toxicity categories; and iv) the  
15 gene network data from properly screened human iPS cells can successfully, although not  
16 perfectly, predict the toxicity categories at significant accuracies once the toxicities are  
17 learned by transfer learning using the models based on human ES cell data only.

18 Various alternative methods using pseudo-human systems, such as  
19 differentiated human cell lines (HepG2, MCF-7, HeLa, etc.), have been reported<sup>16</sup> since  
20 animal protection has become a higher priority in research. However, these lines are often



1 derived from cancer or immortalized cells and thus have limited use<sup>17</sup>. On the other hand,  
2 primary cells, which are assumed to resemble natural states in the human body, show  
3 batch-to-batch variability<sup>17</sup> and are difficult to collect at sufficient amounts. Furthermore,  
4 it is difficult to extrapolate toxicity tests on some cell types to other target cell types due  
5 to differences in cytotoxicity tolerance<sup>18</sup>. Performing a multi-target toxicity prediction  
6 system based on stem cells, as we propose here, provides a more valid prediction of  
7 toxicity to a larger range of cell types.

8 Toxicological assessment using the transcriptome is frequently used by the U.S.  
9 EPA, Tox21 project and in Europe. Particularly, New Approach Methodologies (NAMs),  
10 which are any technology, methodology, approach or combination thereof that can be  
11 used to provide information on chemical hazards and risk assessments that avoids the use  
12 of intact animals<sup>19</sup>, are often directional concepts using transcriptomics with other omics  
13 or traditional toxicology methods. Our study indicated that transcription factor gene  
14 networks exist in a master layer of biological pathways to activate molecular initiation  
15 events (MIEs), in which the initial chemical trigger starts an adverse outcome pathway  
16 (AOP) via DNA-binding, receptor activation, or a disturbance of cellular / organelle  
17 systems<sup>20</sup>, thus revealing toxicity reactions. Recent studies have endorsed the idea that  
18 transcription factors of signal receptors might play a role in interfacing outside signals,  
19 such as aryl hydrocarbon or androgen, to activate toxicological AOPs in HepaRG<sup>TM</sup>  
20 cells<sup>21</sup>. In our system, we used 20 transcription factor genes from 5 PCs due to limited

1 resources and cost, but it should be possible to customize the set of genes and PCs to  
2 reflect more accurately the specific AOPs in the endpoint organ. To pursue a full  
3 coverage of endpoint organs and AOPs, RNA-seq analysis and a library of all 4,033  
4 transcription factor genes for the test chemicals at low cost are needed.

5 Previous systems using QSAR theory depend on the information of chemicals  
6 only and are thus inapplicable to mixtures such as food, Chinese or herbal medicines, and  
7 other compounds to assess toxicity as a whole. Our hEST / hiPST-GN system detects the  
8 cellular toxic events of these mixtures, providing the prediction of holistic cellular  
9 reactions, making it a resource for industries that mix independent chemical ingredients,  
10 including cosmetic, air-conditioner, and automotive companies who need to assess the  
11 toxicity of mixtures in their final or intermediate products, media, emissions, detergents,  
12 etc. In fact, more than 100 members from a wide variety of  
13 industry-government-academia fields are involved in our non-profit consortium  
14 (scChemRISC). By developing products from candidate substances that are predicted to  
15 have little toxicity, our system will contribute to industry not only for efficiency but also  
16 for human health.

17 Recently, toxicity reaction differences due to ethnicity, or genome haplotypes,  
18 have been widely reported due to the globalization of foods and products among  
19 countries. For example, catechin, which is contained in green tea and is widely consumed  
20 in Asian countries, is reported to induce severe liver injury in the United States<sup>22</sup>. The

1 CiRA Foundation (Kyoto, Japan) has announced myiPS cells, a project in which  
2 individuals can have their own iPS cells generated and banked. Our hiPST-GN system  
3 could allow a tailor-made chemical toxicity assessment for these cells to detect individual  
4 differences in toxic tolerance for different substances. Ideally, it also has the potential to  
5 reduce medical accidents if myiPS cells could be used to diagnosis whether a medication  
6 is toxic before receiving the treatment<sup>17,23</sup>. In general, by performing a battery of toxicity  
7 assessments using multiple iPS cell lines from individuals with various haplotypes, our  
8 system may contribute to reducing toxicity accidents often caused by a small number of  
9 test samples of limited genomic variances.

10 In conclusion, the largest advantage of our hEST / hiPST-GN is the ability to  
11 perform toxicity hazard assessments for multiple endpoints with high accuracy in a short  
12 amount of time and a low cost. We believe that our system will greatly benefit research  
13 that will be affected by the lost funding for mammal studies designated to happen in 2035  
14 by the U.S. EPA.

15

## 1 **FIGURE LEGENDS**

### 2 **Figure 1: Construction of a gene expression database for 24 chemicals**

3 (a) Schema of the chemical assay. hESC, human ES cells; hiPSC, human iPS cells. (b)  
4 IC50 for 24 chemicals. (c) Transcription factor genes differentially expressed following  
5 exposure to 24 chemicals at 1/2 dose. (d) PCA of 24 chemicals in six toxicity categories at  
6 two time points.

7

### 8 **Figure 2: Prediction of six toxicity categories using KhES-3 cells**

9 (a) Gene network representation of GGMs from KhES-3 cells. (b) ROC curves for the  
10 prediction of chemicals in two toxicity categories (c) Pathway analysis for hepatotoxins  
11 at 24 h and high-dose (1/1, 1/2 doses) samples.

12

### 13 **Figure 3: Summary of toxicity category prediction for 24 chemicals using HPS4138** 14 **cells**

15 Blue dots indicate predicted SVM values of iPS cell data, and filled and open markers  
16 indicate true and false predictions, respectively. Black dots and bars indicate the means  $\pm$   
17 S.E.M. of SVM values for random data. In the tables, the label columns contain prior  
18 knowledge regarding whether the chemical shows toxicity (P: positive) or not (N:  
19 negative). The SVM column contains the SVM values of the iPS cell data. The expected  
20 accuracy (Exp.Acc.) columns contain the prediction accuracy using random data. The

1 graphs below the tables show the probability distribution of the prediction accuracy using  
2 random data. Black lines indicate the probability density estimated using the t distribution  
3 (degrees of freedom = 9). Black shaded areas represent the upper 5%. Blue dashed lines  
4 indicate the prediction accuracy using iPS cell data.  
5

## 1 **EXPERIMENTAL PROCEDURES**

### 2 **Cell culture experiments**

3 The KhES-3 cell line was established at and provided by Kyoto University<sup>24</sup>. The  
4 protocol of this study was reviewed by the Ethics Committee of CiRA in accordance  
5 with the "Guidelines for Derivation and Utilization of Human Embryonic Stem Cells"  
6 by the Ministry of Education, Culture, Sports, Science and Technology, Japan. The iPS  
7 cell lines were established from healthy Japanese donors at CiRA, Kyoto University,  
8 and were approved for use by the Ethics Committee of Kyoto University.

9 Since it has been reported that the toxicity of antioxidants such as catechin is suppressed  
10 in the presence of albumin<sup>25</sup>, maintenance culture was carried out for all cell lines  
11 including human ES cells using albumin-free Essential 8 Medium (Thermo Fisher  
12 Scientific) in six-well feeder-free culture dishes coated with 5 µg/mL vitronectin  
13 (VTN-N; Thermo Fisher Scientific). When seeding the cells, 10 µM CultureSure®  
14 Y-27632 (FUJIFILM WAKO) was added, and medium exchange on day 1 and thereafter  
15 was performed without Y-27632.

16

### 17 **Selection of toxic chemicals**

18 Twenty-four chemicals were selected and mainly included neurotoxins, hepatotoxins,  
19 cardiotoxins, nephrotoxins, and non-genotoxic carcinogens (**Table 1**). The presence or  
20 absence of toxicity was determined mainly on the basis of information regarding

1 toxicity and assorted disorders and diseases available at PubChem  
2 (<https://pubchem.ncbi.nlm.nih.gov/>). With respect to neurotoxicity, among the  
3 chemicals previously reported in the literature, those having only developmental  
4 toxicity were classified as 'negative,' as the present study targeted adult toxicity. In  
5 addition, when determining the presence or absence of hepatotoxicity, chemicals with  
6 DILI rank  $\geq 3$  were considered hepatotoxic chemicals; with regard to others, those with  
7 reliable reports of liver diseases were considered hepatotoxic. As for cardiotoxicity,  
8 chemicals that have been reported to be associated with heart disease were considered  
9 cardiotoxic. With regard to the kidney, due to its diverse and complex structure, the area  
10 of damage was divided into two sites, namely, the glomeruli and renal tubules.  
11 Chlorpheniramine and cyclopamine were the chemicals judged to be completely  
12 'negative' and belonged to none of the toxicity categories examined in the present study.  
13 On the other hand, 19 chemicals had multiple overlapping toxicities, whereas  
14 acetonylacetone, bucillamine, and butylated HA had only one toxicity<sup>26-70</sup>.

15

#### 16 **Chemical exposures and determination of IC logistic model equations**

17 DMSO or water was used as solvent (vehicle) for the 24 chemicals based on known  
18 information (<https://pubchem.ncbi.nlm.nih.gov/>). For each of the 24 toxic chemicals, a  
19 stock solution was prepared with the highest soluble concentration. First, in order to  
20 perform the ATP assay to determine the exposure doses for testing, we performed 10

1 serial three-fold dilutions of the stock solution; the prepared exposure solution was  
2 added to the cells (i.e., exposure) so that the concentration in the medium was 0.1% of  
3 the exposure solution. The cells were cultured on 96-well black/clear flat bottom  
4 TC-treated plates (Falcon), 8,000 cells were seeded, and the medium was exchanged on  
5 day 1. The cells were exposed to chemicals on day 2. No medium exchange was  
6 performed after exposure, and the ATP assay was performed 48 h after exposure. For  
7 100  $\mu$ L of culture medium, 100  $\mu$ L of CellTiter-Glo<sup>®</sup> Luminescent Cell Viability Assay  
8 (Promega Corporation) was added, and emitted light was measured with a 2104  
9 EnVision Multilabel Plate Reader (PerkinElmer). From four luminescence  
10 measurements for 10 concentrations and a blank as described above, regression analysis  
11 was performed by fitting the three-parameter log-logistic model with the R-4.0.5 drc  
12 package, and IC<sub>0.1</sub> and IC<sub>50</sub> values were obtained (**Tables S1 and S2**). IC<sub>50</sub> values  
13 were plotted using the ggplot2 package (**Fig. 1b**).

14

### 15 **RNA-seq analysis**

16 On day 2 after seeding, the cells were exposed to the chemicals. For each of the 24  
17 chemicals, the exposure dose was set between IC<sub>0.1</sub> and IC<sub>50</sub> depending on the degree  
18 of cell death. Using this value as the maximum exposure dose, five serial two-fold  
19 dilutions (1/1, 1/2, 1/4, 1/8, 1/16) were performed, and a total of six doses including a  
20 solvent-only control (vehicle) were used. After exposure, no medium exchange was



1 performed, and samples were obtained at two time points (24 h and 48 h) with two  
2 repeats, i.e., a total of  $24 \times 6 \times 2 \times 2 = 576$  samples. After RNA purification using an  
3 RNeasy Mini Kit (QIAGEN), sequence libraries were prepared for each sample using  
4 TruSeq Stranded mRNA Library Prep/TruSeq RNA Single Indexes Set A & Set B  
5 (Illumina, Inc.). For sequencing, high-throughput sequencing was performed using  
6 HiSeq4000 (Illumina, Inc.). We used bowtie-2.2.5 with the option  
7 "--very-sensitive-local" to map the obtained Illumina reads to Ensemble GRCh38r100  
8 human cDNA and ncRNA sequences, added up the reads for each gene using MAPQ  $\geq$   
9 1 transcript, and obtained average counts of 28,652,809 and 28,291,682 reads for each  
10 sample at 24 h and 48 h, respectively. From these, we selected only transcription  
11 factor-related genes included in the Gene Ontology GO:0006351 using BioMart (4,032  
12 genes). These genes were filtered using the statistical analysis language R-4.0.5 package  
13 edgeR<sup>71</sup> (<https://www.r-project.org/>) with the filterByExpr function min.count = 30,  
14 min.total.count = 0, and then normalized to log<sub>2</sub> counts per million (logCPM) using the  
15 voom function. Furthermore, the removeBatchEffect function was used to eliminate  
16 batch effects.

17

### 18 **Differentially expressed gene analysis and principal component analysis**

19 At 24 h and 48 h, for a total of 122 groups including 120 conditions (five concentrations  
20 each for 24 chemicals) and two solvent conditions (DMSO or water), we used a linear

1 model fitting with the lmFit function of the limma package<sup>72</sup> in R and moderated  
2 t-statistics with eBayes to analyze DEGs with respect to gene expression levels in terms  
3 of the LFC between 24 chemicals and their corresponding solvent<sup>73</sup>, and created a  
4 heatmap of genes with an LFC > 1 and FDR (false discovery rate) < 0.01 using the  
5 pheatmap package in R (**Fig. 1c, Fig. S2**). In addition, using the LFC values obtained  
6 for 120 conditions, PCA was performed for each of the two time points (24 h, 48 h)  
7 using the prcomp function in R (**Fig. 1d, Fig. S3**).

8

### 9 **Gene network construction by Graphical Gaussian Model (GGM)**

10 Based on results obtained in the aforementioned PCA, a total of 20 genes (two genes  
11 each with the top positive and negative loading values in the first to fifth PCs) were  
12 used to construct gene networks. To estimate the GGM for each of the 24 chemicals, we  
13 used the aforementioned LFC values to calculate the sparse partial correlation  
14 coefficient network with L1 graphical lasso using EBICglasso in the R package qgraph  
15 (<https://cran.r-project.org/web/packages/qgraph/qgraph.pdf>)<sup>74</sup>. For model fitting, regular  
16 BIC with gamma = 0 was used, and regularization of sparsity was tried 1000 different  
17 ways with nlambdas = 1000 for estimation. In the estimation, in order to avoid the  
18 problem of covariance matrices failing to be positive definite, calculations were  
19 performed with checkPD=FALSE (**Fig. 2a, Fig. S4, Fig. S5**).

20

## 1 **Prediction by support vector machine (SVM)**

2 The SVM program and protocol used in the present study were adopted according to the  
3 report of Takahashi et al.<sup>75</sup> Four kernel functions were used: linear, polynomial, RBF,  
4 and maximum entropy, and parameter types and combinations were calculated  
5 according to the above report<sup>75</sup>. In the calculation, 190 values of partial correlation  
6 coefficients among 20 genes in the GGM for each of the 24 chemicals described above  
7 were used as input data, and using LOOCV, the genes were ranked using the  
8 two-sample t-test (two-sided) in each iteration, and the maximum accuracy and the  
9 maximum AUC to achieve the maximum accuracy were recorded, varying the number  
10 of values from 1 to 190. To statistically evaluate the maximum accuracy and AUC, 24 x  
11 190 uniform random numbers were generated 10 times, and the maximum accuracy  
12 with the maximum AUC were recorded in a similar fashion. One-sample t-test  
13 (one-sided) was performed with the average values and standard deviations of  
14 maximum GGM accuracies and AUCs obtained from these 10 attempts. For  
15 comparison, LFC data for the transcription factor genes at five concentrations before  
16 calculating the GGM (24 x 5 x 3,200 or 3,255 values in total) were used as input data,  
17 and the maximum accuracy and the corresponding AUC value were recorded in a  
18 similar manner. In addition, to compare with predictions based on QSAR, 5,666  
19 molecular descriptors were created using alvaDesc (Affinity Science)  
20 (<https://www.alvascience.com/alvadesc/>). We obtained information from PubChem DB

1 (<https://pubchem.ncbi.nlm.nih.gov/>) 3D Conformer data regarding 20 of the 24  
2 chemicals; for the four other chemicals for which information could not be obtained  
3 from PubChem DB (cisplatin, cyclosporin A, digoxin, and gentamicin), the SMILES  
4 format was converted into 3D molecular descriptors using CORINA Classic  
5 ([https://www.mn-am.com/online\\_demos/corina\\_demo](https://www.mn-am.com/online_demos/corina_demo)) and entered into alvaDesc.

6

### 7 **Gene set enrichment analysis**

8 We created LFC data for all genes by performing the same preprocess as for the  
9 transcription factor genes (21,650 and 22,298 genes for 24 h and 48 h, respectively) and  
10 divided them into high-dose (1/1/, 1/2) and low-dose (1/8, 1/16) groups to perform  
11 GSEA for each group using the R package *fgsea*<sup>76</sup>. As for the gene sets used, among the  
12 MSigDB Collections provided by GSEA (<https://www.gsea-msigdb.org/gsea/index.jsp>),  
13 we used 50 hallmark gene sets. The heatmap was generated with FDR-adjusted p values  
14 obtained using the *fgsea* package.

15

### 16 **Selection of HPS4138 iPS cells**

17 The measurement of the differentiation potential to the three germ layers was performed  
18 according to a previous report<sup>15</sup>, where we examined the expression ratio of two marker  
19 genes for each layer (*PAX6*, *SOX2*, *BRA*, *NCAM*, *SOX17*, and *FOXA2*) by means of  
20 fluorescence activated cell sorting. Among the ranked Japanese male cell lines derived

1 from healthy individuals, we used the top 20 cell lines according to their total ratios<sup>15</sup>.  
2 These cell lines were kept in maintenance culture with StemFit AK02N medium  
3 (Ajinomoto) and then cultured for two passages in maintenance culture using Essential  
4 8 Medium (Thermo Fisher Scientific) as in the case of KhES-3. Among the 20 cell  
5 lines, one underwent cell death, and the remaining 19 were subjected to pre-screening  
6 using 20 chemicals with a wide range of toxicities (valproic acid, cyclopamine,  
7 acrylamide, acetonylacetone, chlorpromazine, chlorpheniramine, atorvastatin,  
8 amiodarone, verapamil HCl, dimethoate, arsenic trioxide, quinidine, axitinib,  
9 doxorubicin, gentamicin, ibuprofen, lithocholic acid, thioacetamide, butylated HA, and  
10 methapyrilene HCl) by comparing the ATP assay results with those for ES cells. The  
11 details of the ATP assay are described above. For exposure concentrations, the IC<sub>50</sub>  
12 determined with KhES-3 was used, and the growth rate of human iPS cells was  
13 examined. Among the candidate cell lines, the top three cell lines (HPS4138, HPS4234,  
14 and HPS4046) whose growth rates at IC<sub>50</sub> correlated well with that of KhES-3 were  
15 selected, and again, the growth rate at IC<sub>50</sub> was confirmed by the ATP assay using 20 of  
16 the 24 toxic chemicals examined in the present study (**Table S6**) to select the cell line  
17 with the largest correlation coefficient, i.e., HPS4138.

18

19 **Gene expression data from HPS4138 by RT-qPCR**

1 The five serial exposure concentrations of the 24 chemicals for iPS cells were  
2 determined by the ATP assay, as described above with respect to ES cells. For each of  
3 the 20 genes at 24 h and 48 h used for the construction of the GGM for ES cells, the  
4 primer sequence pair was designed using Primer 3 (version 0.4.0) based on the human  
5 cDNA sequence data obtained from Ensembl GRCh38r100, and the obtained primer  
6 sequence pair was synthesized (Hokkaido System Science). We confirmed whether the  
7 target PCR product could be obtained from the primer sequence pair according to the  
8 product size determined by electrophoresis. On day 2 after seeding, HPS4138 cells were  
9 exposed to the 24 chemicals. With regard to exposure concentrations, time points, and  
10 repeat experiments, we followed the experiments performed with ES cells. After  
11 purification using an RNeasy Mini Kit, RNA was transcribed to cDNA using a  
12 PrimeScript™ RT Reagent Kit (Perfect Real Time) (TaKaRa), and the synthesized  
13 primers for qRT-PCR and KAPA SYBR Fast qPCR Kit (KAPA BIOSYSTEMS) were  
14 used to perform qRT-PCR with StepOnePlus (Applied Biosystems).  $\Delta C_T$  values of the  
15 resulting genes were obtained by subtracting from the  $C_T$  values the value of the internal  
16 control (*GAPDH* gene). The average value of two repeated measurements at each  
17 concentration was determined. In addition, for solvents (DMSO and water),  $\Delta C_T$  values  
18 were obtained by subtracting the value of *GAPDH* gene, and the average of all values  
19 was determined. The difference,  $\Delta\Delta C_T$ , between the  $\Delta C_T$  value at each concentration  
20 and that of the solvent was determined and is referred to as LFC. Covariance matrices

1 among the 20 genes were calculated and used as input data in the construction of the  
2 GGM.

3

#### 4 **Transductive transfer learning by SVM**

5 A total of 380 edges in the GGM of ES cells and the GGM of iPS cells were used to  
6 perform the prediction of chemicals in the six toxicity categories under conditions  
7 similar to the SVM protocol described above. For learning, labels of the 24 chemicals in  
8 ES cells were provided, whereas none of the labels of the 24 chemicals in iPS cells were  
9 provided (i.e., zero); prediction was performed via transductive transfer learning. As in  
10 the case of ES cells, prediction was also performed by replacing with uniform random  
11 numbers 10 times only the values of the 24 x 190 input data for iPS cells, and similar to  
12 ES cells, the one-sample t-test (one-sided) was used to assess the maximum accuracy  
13 and the corresponding AUC value.

14

#### 15 **DATA AVAILABILITY**

16 The source code of analysis program and the data supporting the findings of this study  
17 are available from the corresponding author upon reasonable request. The RNA-seq  
18 data reported in this paper have been deposited in NCBI's Gene Expression Omnibus  
19 and are accessible through GEO series accession number GSE188203.

20

1 **SUPPLEMENTAL INFORMATION**

2 Supplemental Information includes eight extended data figures and nine supplemental  
3 tables and can be found with this article online at:

4

5 **AUTHOR CONTRIBUTIONS**

6 WF conceptualized the research and led the project. JY drafted the manuscript. JY and  
7 KK provided the stem cell data. JY, TW, WF, and JKY analyzed the data. HO, KI, MS,  
8 TH, SS, HK, and HS selected the toxic chemicals. MO, and MKS provided the iPS cell  
9 lines.

10

11 **ACKNOWLEDGEMENTS**

12 The authors deeply appreciate Prof. Shinya Yamanaka for kindly advising on the  
13 selection of iPS cell lines. The authors also deeply appreciate Dr. Peter Karagiannis for  
14 kindly reviewing the manuscript. This work was partially supported by Kyowa Kirin  
15 Co., Ltd., Shiseido Co. Ltd. (for only iPS cell line screening), and the Core Center for  
16 iPS Cell Research, Research Center Network for Realization of Regenerative Medicine  
17 (20bm0104001h0008/21bm0104001h0009) and the Program for Intractable Diseases  
18 Research utilizing Disease-specific iPS cells (19bm0804001), Japan Agency for  
19 Medical Research and Development (AMED).

20



1    **COMPETING INTERESTS**

2    None declared.

3

4    **REFERENCES**

- 5    1.     Perel, P. et al. Comparison of treatment effects between animal experiments and  
6            clinical trials: systematic review. *Bmj* **334**, 197 (2007).
- 7    2.     Grimm, D. EPA plan to end animal testing splits scientists. *Science (American*  
8            *Association for the Advancement of Science)* **365**, 1231-1231 (2019).
- 9    3.     Scholz, G. et al. Prevalidation of the Embryonic Stem Cell Test (EST)- A New  
10            In Vitro Embryotoxicity Test. *Toxicology in vitro* **13**, 675-681 (1999).
- 11   4.     Seiler, A. E. M., Spielmann H. The validated embryonic stem cell test to predict  
12            embryotoxicity in vitro. *Nature protocols* **6**, 961-978 (2011).
- 13   5.     Schulpen, S. H. W., Theunissen P. T., Pennings J. L., Piersma A. H. Comparison  
14            of gene expression regulation in mouse- and human embryonic stem cell assays  
15            during neural differentiation and in response to valproic acid exposure.  
16            *Reproductive toxicology (Elmsford, N.Y.)* **56**, 77-86 (2015).
- 17   6.     Low, L. A., Mummery C., Berridge B. R., Austin C. P., Tagle D. A.  
18            Organs-on-chips: into the next decade. *Nature reviews. Drug discovery* **20**,  
19            345-361 (2021).
- 20   7.     Allwardt, V. et al. Translational Roadmap for the Organs-on-a-Chip Industry

- 1            toward Broad Adoption. *Bioengineering (Basel)* **7**, (2020).
- 2    8.        Schultz, T. W. Structure-Toxicity Relationships for Benzenes Evaluated with
- 3            Tetrahymena pyriformis. *Chemical research in toxicology* **12**, 1262-1267 (1999).
- 4    9.        Reik, W., Dean W., Walter J. Epigenetic Reprogramming in Mammalian
- 5            Development. *Science (American Association for the Advancement of Science)*
- 6            **293**, 1089-1093 (2001).
- 7    10.       Yamane, J. et al. Prediction of developmental chemical toxicity based on gene
- 8            networks of human embryonic stem cells. *Nucleic acids research* **44**, 5515-5528
- 9            (2016).
- 10   11.       Goodal, C. R. Graphical Models in Applied Multivariate Statistics.
- 11            *Technometrics* **33**, 476-478 (1991).
- 12   12.       Vapnik, V. Estimation of dependences based on empirical data. *Springer Science*
- 13            (2006).
- 14   13.       Cortes, C. Support-vector networks. *Machine Learning* **20**, 273-297 (1995).
- 15   14.       *ACTR3*,
- 16            [https://asia.ensembl.org/Homo\\_sapiens/Gene/Summary?db=core;g=ENSG0000](https://asia.ensembl.org/Homo_sapiens/Gene/Summary?db=core;g=ENSG0000)
- 17            0115091;r=2:113890063-113962596
- 18   15.       Matsuda, M. et al. Recapitulating the human segmentation clock with
- 19            pluripotent stem cells. *Nature (London)* **580**, 124-129 (2020).
- 20   16.       Qu, W. et al. Exploration of xenobiotic metabolism within cell lines used for

- 1 Tox21 chemical screening. *Toxicol In Vitro* **73**, 105109 (2021).
- 2 17. Kim, T. W., Che J. H., Yun J. W. Use of stem cells as alternative methods to  
3 animal experimentation in predictive toxicology. *Regul Toxicol Pharmacol* **105**,  
4 15-29 (2019).
- 5 18. Laschinski, G., Vogel R., Spielmann H. Cytotoxicity test using  
6 blastocyst-derived euploid embryonal stem cells: a new approach to in vitro  
7 teratogenesis screening. *Reprod Toxicol* **5**, 57-64 (1991).
- 8 19. US EPA. New approach methods work plan: Reducing use of animals in  
9 chemical testing. (2020).
- 10 20. Allen, T. E., Goodman J. M., Gutsell S., Russell P. J. A History of the Molecular  
11 Initiating Event. *Chem Res Toxicol* **29**, 2060-2070 (2016).
- 12 21. Franzosa, J. A. et al. High-throughput toxicogenomic screening of chemicals in  
13 the environment using metabolically competent hepatic cell cultures. *NPJ Syst*  
14 *Biol Appl* **7**, 7 (2021).
- 15 22. Oketch-Rabah, H. A. et al. United States Pharmacopeia (USP) comprehensive  
16 review of the hepatotoxicity of green tea extracts. *Toxicol Rep* **7**, 386-402  
17 (2020).
- 18 23. Easley, C. A. Induced Pluripotent Stem Cells (iPSCs) in Developmental  
19 Toxicology. *Methods Mol Biol* **1965**, 19-34 (2019).
- 20 24. Nakatsuji, N. Establishment and Manipulation of Monkey and Human

- 1           Embryonic Stem Cell Lines for Biomedical Research. *Ernst. Schering Res.*  
2           *Found Workshop* **54**, 15-26 (2005).
- 3   25.   Zhang, Y. et al. FBS or BSA Inhibits EGCG Induced Cell Death through  
4           Covalent Binding and the Reduction of Intracellular ROS Production. *BioMed*  
5           *research international* **2016**, 1-8 (2016).
- 6   26.   LoPachin, R. M. et al. Neurological Evaluation of Toxic Axonopathies in Rats:  
7           Acrylamide and 2,5-Hexanedione. *Neurotoxicology (Park Forest South)* **23**,  
8           95-110 (2002).
- 9   27.   Abarbanel, J. M., Osiman A., Frisher S., Herishanu Y. Peripheral neuropathy and  
10          cerebellar syndrome associated with amiodarone therapy. *Isr J Med Sci* **23**,  
11          893-895 (1987).
- 12   28.   Sudoh, Y. et al. Neurologic and histopathologic evaluation after high-volume  
13          intrathecal amitriptyline. *Regional anesthesia and pain medicine* **29**, 434-440  
14          (2004).
- 15   29.   Ferguson, S. A., Paule M. G. Acute effects of chlorpromazine in a monkey  
16          operant behavioral test battery. *Pharmacology, biochemistry and behavior* **42**,  
17          333-341 (1992).
- 18   30.   Pilling, R. F., Sabri K., Chaudhuri P. R. Non-Traumatic Sixth Nerve Palsy in a  
19          Young Patient. *Strabismus* **13**, 11-13 (2005).
- 20   31.   Maheut-Bosser, A., Brembilla-Perrot B., Hanesse B., Piffer I., Paille F.

- 1           Cognitive impairment induced by digoxin intake in patients older than 65  
2           years. *Ann. Cardiol. Angeiol. (Paris)* **55**, 246-248 (2006).
- 3   32.   Jordan, B., Pasquier Y., Schnider A. Neurological improvement and  
4           rehabilitation potential following toxic myelopathy due to intrathecal injection  
5           of doxorubicin. *Spinal cord* **42**, 371-373 (2004).
- 6   33.   Sha, S. H., Schacht J. Salicylate attenuates gentamicin-induced ototoxicity. *Lab*  
7           *Invest* **79**, 807-813 (1999).
- 8   34.   Lee, R. Z., Hardiman O., O'Connell P. G. Ibuprofen-induced aseptic  
9           meningoencephalitis. *Rheumatology* **41**, 353-355 (2002).
- 10   35.   Ruuskanen, I., Kilpelainen H. O., Riekkinen P. J. Side effects of sodium  
11           valproate during long-term treatment in epilepsy. *Acta neurologica Scandinavica*  
12           **60**, 125-128 (1979).
- 13   36.   Allam, A. A. et al. Effect of prenatal and perinatal acrylamide on the  
14           biochemical and morphological changes in liver of developing albino rat.  
15           *Archives of toxicology* **84**, 129-141 (2010).
- 16   37.   Fickert, P. et al. Lithocholic Acid Feeding Induces Segmental Bile Duct  
17           Obstruction and Destructive Cholangitis in Mice. *The American journal of*  
18           *pathology* **168**, 410-422 (2006).
- 19   38.   Ellinger-Ziegelbauer, H., Stuart B., Wahle B., Bomann W., Ahr H. J.  
20           Comparison of the expression profiles induced by genotoxic and nongenotoxic

- 1 carcinogens in rat liver. *Mutation Research/Fundamental and Molecular*  
2 *Mechanisms of Mutagenesis* **575**, 61-84 (2005).
- 3 39. El-Tanbouly, D. M., Wadie W., Sayed R. H. Modulation of TGF- $\beta$ /Smad and  
4 ERK signaling pathways mediates the anti-fibrotic effect of mirtazapine in mice.  
5 *Toxicology and applied pharmacology* **329**, 224-230 (2017).
- 6 40. Seong, J. et al. Lethal hepatic injury by combined treatment of radiation plus  
7 chemotherapy in rats with thioacetamide-induced liver cirrhosis. *International*  
8 *journal of radiation oncology, biology, physics* **57**, 282-288 (2003).
- 9 41. Clements, M., Millar V., Williams A. S., Kalinka S. Bridging Functional and  
10 Structural Cardiotoxicity Assays Using Human Embryonic Stem Cell-Derived  
11 Cardiomyocytes for a More Comprehensive Risk Assessment. *Toxicological*  
12 *sciences* **148**, 241-260 (2015).
- 13 42. Srinivasa, V. et al. The Relative Toxicity of Amitriptyline, Bupivacaine, and  
14 Levobupivacaine Administered as Rapid Infusions in Rats. *Anesthesia* **97**, 91-95  
15 (2003).
- 16 43. Lin, Z., Will Y. Evaluation of Drugs With Specific Organ Toxicities in  
17 Organ-Specific Cell Lines. *Toxicological sciences* **126**, 114-127 (2012).
- 18 44. Saito, K. et al. Chlorpromazine-induced cardiomyopathy in rats. *Heart and*  
19 *vessels* **1**, 283-285 (1985).
- 20 45. Miller, L. W. Cardiovascular Toxicities of Immunosuppressive Agents.

- 1            *American journal of transplantation* **2**, 807-818 (2002).
- 2    46.    Rea, T. D. et al. Digoxin therapy and the risk of primary cardiac arrest in  
3            patients with congestive heart failure. *Journal of clinical epidemiology* **56**,  
4            646-650 (2003).
- 5    47.    Mladosevicova, B., Foltinová, A., Petrásová, H., Bernadic M., Hulín, I.  
6            Signal-averaged electrocardiography in survivors of Hodgkin's disease treated  
7            with and without dexrazoxane. *Neoplasma* **48**, 61-65 (2001).
- 8    48.    Hendry, P. J, Taichman G. C., Taichman S. J., Keon W. J. Human myocardial  
9            responses to antibiotics: gentamicin, tobramycin and cephalothin. *Can J Cardiol*  
10           4, 219-222 (1988).
- 11   49.    Cappon, G. D., Fleeman T. L., Cook J. C., Hurtt M. E. Combined Treatment  
12           Potentiates the Developmental Toxicity of Ibuprofen and Acetazolamide in Rats.  
13           *Drug and chemical toxicology (New York, N.Y. 1978)* **28**, 409-421 (2005).
- 14   50.    Okuyan, H., Altin, C. Heart failure induced by itraconazole. *Indian journal of*  
15           *pharmacology* **45**, 524-525 (2013).
- 16   51.    Doherty, K. R. et al. Multi-parameter in vitro toxicity testing of crizotinib,  
17           sunitinib, erlotinib, and nilotinib in human cardiomyocytes. *Toxicology and*  
18           *applied pharmacology* **272**, 245-255 (2013).
- 19   52.    Carter, B. S., Stewart J. M. Valproic Acid Prenatal Exposure Association With  
20           Lipomyelomeningocele. *Clinical pediatrics* **28**, 81-85 (1989).

- 1 53. McGovern, B., Garan H., Ruskin J. N. Precipitation of Cardiac Arrest by  
2 Verapamil in Patients with Wolff-ParkinsonWhite Syndrome. *Annals of Internal*  
3 *Medicine* **104**, 791-794 (1986).
- 4 54. Kimura, T. et al. Amiodarone-related pulmonary mass and unique membranous  
5 glomerulonephritis in a patient with valvular heart disease: Diagnostic pitfall  
6 and new findings. *Pathology international* **58**, 657-663 (2008).
- 7 55. Ohno, I. Drug induced nephrotic syndrome. *Nihon Rinsho* **62**, 1919-1924  
8 (2004).
- 9 56. Baroni, E. A., Costa R. S., Volpini R., Coimbra T. M. Sodium bicarbonate  
10 treatment reduces renal injury, renal production of transforming growth  
11 Factor-beta, and urinary transforming growth Factor-beta excretion in rats with  
12 doxorubicin-induced nephropathy. *American journal of kidney diseases* **34**,  
13 328-337 (1999).
- 14 57. Sorich, M. J., Rowland A., Kichenadasse G., Woodman R. J., Mangoni A. A.  
15 Risk factors of proteinuria in renal cell carcinoma patients treated with VEGF  
16 inhibitors: a secondary analysis of pooled clinical trial data. *British journal of*  
17 *cancer* **114**, 1313-1317 (2016).
- 18 58. Ali, B. H., Al-Qarawi A. A., Mousa H. M. The effect of calcium load and the  
19 calcium channel blocker verapamil on gentamicin nephrotoxicity in rats. *Food*  
20 *and chemical toxicology* **40**, 1843-1847 (2002).



- 1 59. Ozkok, A., Edelstein C. L. Pathophysiology of Cisplatin-Induced Acute Kidney  
2 Injury. *BioMed research international* **2014**, 1-17 (2014).
- 3 60. Humes, H. D., Jackson N. M., O'Connor R. P., Hunt D. A., White M. D.  
4 Pathogenetic mechanisms of nephrotoxicity: insights into cyclosporine  
5 nephrotoxicity. *Transplant Proc* **17**, 51-62 (1985).
- 6 61. Xie, Y. et al. Expression of osteopontin in gentamicin-induced acute tubular  
7 necrosis and its recovery process. *Kidney international* **59**, 959-974 (2001).
- 8 62. Marasco, W. A. et al. Ibuprofen-associated renal dysfunction. Pathophysiologic  
9 mechanisms of acute renal failure, hyperkalemia, tubular necrosis, and  
10 proteinuria. *Archives of internal medicine (1960)* **147**, 2107-2116 (1987).
- 11 63. Boelaert, J. et al. Itraconazole pharmacokinetics in patients with renal  
12 dysfunction. *Antimicrobial agents and chemotherapy* **32**, 1595-1597 (1988).
- 13 64. Raza, M., al-Shabanah, O. A., al-Bekairi, A. M., Qureshi, S. Pathomorphological  
14 changes in mouse liver and kidney during prolonged valproate administration.  
15 *Int J Tissue React* **22**, 15-21 (2000).
- 16 65. Kreft, B., de Wit, C., Marre, R., Sack, K. Experimental studies on the  
17 nephrotoxicity of amphotericin B in rats. *Journal of antimicrobial chemotherapy*  
18 **28**, 271-281 (1991).
- 19 66. Hirose, M., Masuda A., Hasegawa R., Wada S., Ito N. Regression of butylated  
20 hydroxyanisole (BHA)-induced hyperplasia but not dysplasia in the forestomach

- 1 of hamsters. *Carcinogenesis (New York)* **11**, 239-244 (1990).
- 2 67. Kitazawa, S. et al. Enhanced preneoplastic liver lesion development under  
3 'selection pressure' conditions after administration of deoxycholic or lithocholic  
4 acid in the initiation phase in rats. *Carcinogenesis (New York)* **11**, 1323-1328  
5 (1990).
- 6 68. Kitazawa, S. Studies on initiating activity of secondary bile acids for rat  
7 hepatocarcinogenesis. *Hokkaido Igaku Zasshi* **68**, 110-120 (1993).
- 8 69. Colombo, C. et al. Long-Term Ursodeoxycholic Acid Therapy Does Not Alter  
9 Lithocholic Acid Levels in Patients with Cystic Fibrosis with Associated Liver  
10 Disease. *The Journal of pediatrics* **177**, 59-65.e51 (2016).
- 11 70. Mizukami, S. et al. Downregulation of TMEM70 in Rat Liver Cells After  
12 Hepatocarcinogen Treatment Related to the Warburg Effect in  
13 Hepatocarcinogenesis Producing GST-P-Expressing Proliferative Lesions.  
14 *Toxicological sciences* **159**, 211-223 (2017).
- 15 71. Robinson, M. D., McCarthy D. J., Smyth G. K. edgeR: a Bioconductor package  
16 for differential expression analysis of digital gene expression data.  
17 *Bioinformatics (Oxford, England)* **26**, 139-140 (2010).
- 18 72. Ritchie, M. E. et al. limma powers differential expression analyses for  
19 RNA-sequencing and microarray studies. *Nucleic acids research* **43**, e47-e47  
20 (2015).

- 1 73. *differentially expressed gene analysis*,
- 2 <https://www.bioconductor.org/packages/devel/workflows/vignettes/RNAseq123/>
- 3 <inst/doc/limmaWorkflow.html>
- 4 74. Epskamp, S., Fried E. I. A tutorial on regularized partial correlation networks.
- 5 *Psychological Methods* **23**, 617-634 (2018).
- 6 75. Takahashi, H., Qin X. Y., Sone H., Fujibuchi W. Computational Toxicology
- 7 Stem Cell-Based Methods to Predict Developmental Chemical Toxicity.
- 8 *Methods Mol Biol* **1800**, 475-483 (2018).
- 9 76. Korotkevich, G. Fast gene set enrichment analysis. *bioRxiv*. doi:10.1101/060012
- 10 (2019).

| Chemical Name    | CAS RN      | M.W    | NT | HT | CT | GT | TT | NGC                                                                                                                                                                                                                                                                                                   |
|------------------|-------------|--------|----|----|----|----|----|-------------------------------------------------------------------------------------------------------------------------------------------------------------------------------------------------------------------------------------------------------------------------------------------------------|
| Acetonylacetone  |             |        |    |    |    |    |    |                                                                                                                                                                                                                                                                                                       |
| Acrylamide       | 79-06-1     | 71.08  |    |    |    |    |    | Group B2<br><a href="https://www.epa.gov/iris">https://www.epa.gov/iris</a>                                                                                                                                                                                                                           |
| Amiodarone       | 1951-25-3   | 645.3  |    |    |    |    |    | NA                                                                                                                                                                                                                                                                                                    |
| AmitriptylineHCl | 549-18-8    | 313.9  |    |    |    |    |    | NA                                                                                                                                                                                                                                                                                                    |
| Atorvastatin     | 134523-00-5 | 558.6  |    |    |    |    |    | NA                                                                                                                                                                                                                                                                                                    |
| Axitinib         | 319460-85-0 | 386.5  |    |    |    |    |    | NA                                                                                                                                                                                                                                                                                                    |
| Bucillamine      | 65002-17-7  | 223.3  |    |    |    |    |    | NA                                                                                                                                                                                                                                                                                                    |
| ButylatedHA      | 25013-16-5  | 180.24 |    |    |    |    |    | Group 2B<br>Precancerous<br>Conditions [66]                                                                                                                                                                                                                                                           |
| Chlorpheniramine | 132-22-9    | 274.79 |    |    |    |    |    | NA                                                                                                                                                                                                                                                                                                    |
| Chlorpromazine   | 50-53-3     | 318.9  |    |    |    |    |    | NA                                                                                                                                                                                                                                                                                                    |
| Cisplatin        | 14913-33-8  | 300    |    |    |    |    |    | Group 2A<br><a href="http://ntp.niehs.nih.gov/npt/roc/e1eventh/profiles/s053cycl.pdf">http://ntp.niehs.nih.gov/npt/roc/e1eventh/profiles/s053cycl.pdf</a>                                                                                                                                             |
| Cyclopamine      | 4449-51-8   | 411.6  |    |    |    |    |    | NA                                                                                                                                                                                                                                                                                                    |
| CyclosporinA     | 59865-13-3  | 1202.6 |    |    |    |    |    | Group 1<br><a href="http://ntp.niehs.nih.gov/npt/roc/e1eventh/profiles/s053cycl.pdf">http://ntp.niehs.nih.gov/npt/roc/e1eventh/profiles/s053cycl.pdf</a><br>Group 2B<br><a href="https://monographs.iarc.who.int/list-of-classifications">https://monographs.iarc.who.int/list-of-classifications</a> |
| Digoxin          | 20830-75-5  | 780.9  |    |    |    |    |    | Group 2A<br><a href="https://monographs.iarc.who.int/agents-classified-by-the-iarc/">https://monographs.iarc.who.int/agents-classified-by-the-iarc/</a>                                                                                                                                               |
| Doxorubicin      | 23214-92-8  | 543.5  |    |    |    |    |    | NA                                                                                                                                                                                                                                                                                                    |
| Gentamicin       | 1403-66-3   | 477.6  |    |    |    |    |    | NA                                                                                                                                                                                                                                                                                                    |
| Ibuprofen        | 15687-27-1  | 206.28 |    |    |    |    |    | NA                                                                                                                                                                                                                                                                                                    |
| Itraconazole     | 84625-61-6  | 705.6  |    |    |    |    |    | NA                                                                                                                                                                                                                                                                                                    |
| LithocholicAcid  | 434-13-9    | 376.6  |    |    |    |    |    | Precancerous<br>Conditions [67] [68]<br>Cystic fibrosis [69]                                                                                                                                                                                                                                          |
| MethapyrileneHCl | 135-23-9    | 297.8  |    |    |    |    |    | Precancerous<br>Conditions [70]                                                                                                                                                                                                                                                                       |
| Sunitinib        | 557795-19-4 | 398.5  |    |    |    |    |    | NA                                                                                                                                                                                                                                                                                                    |
| Thioacetamide    | 62-55-5     | 75.14  |    |    |    |    |    | Group 2B<br><a href="http://ntp.niehs.nih.gov/npt/roc/e1eventh/profiles/s172thio.pdf">http://ntp.niehs.nih.gov/npt/roc/e1eventh/profiles/s172thio.pdf</a>                                                                                                                                             |
| ValproicAcid     | 99-66-1     | 144.21 |    |    |    |    |    | NA                                                                                                                                                                                                                                                                                                    |
| VerapamilHCl     | 152-11-4    | 491.1  |    |    |    |    |    | NA                                                                                                                                                                                                                                                                                                    |

\* Chemical names are given by referring to PubChem (2021.4.20 ver.).  
Bold characters indicate positive toxicity.

NT, Neurotoxin; HT, Hepatotoxin; CT, Cardiotoxin; GT, Glomerular toxin (Renal toxin); TT, Tubular toxin (Renal toxin); NGC, Non-genotoxic carcinogen

Table 1. List of 24 chemicals

|        |      |                   | NT (13) | HT (15) | CT (13) | GT (6) | TT (7) | NGC (9) |
|--------|------|-------------------|---------|---------|---------|--------|--------|---------|
| Random | 24 h | Mean Accuracy (%) | 85.8    | 83.7    | 83.3    | 87.5   | 87.0   | 87.0    |
|        |      | SD                | 8.13    | 6.92    | 6.81    | 6.21   | 6.65   | 5.38    |
|        |      | Mean AUC          | 0.86    | 0.82    | 0.85    | 0.88   | 0.86   | 0.87    |
|        |      | SD                | 0.09    | 0.11    | 0.09    | 0.07   | 0.11   | 0.06    |
|        | 48 h | Mean Accuracy (%) | 85.8    | 83.7    | 83.3    | 87.5   | 87.0   | 87.0    |
|        |      | SD                | 8.13    | 6.92    | 6.81    | 6.21   | 6.65   | 5.38    |
|        |      | Mean AUC          | 0.86    | 0.82    | 0.85    | 0.88   | 0.86   | 0.87    |
|        |      | SD                | 0.09    | 0.11    | 0.09    | 0.07   | 0.11   | 0.06    |

|                               |      |              |             |              |              |              |              |              |
|-------------------------------|------|--------------|-------------|--------------|--------------|--------------|--------------|--------------|
| Molecular descriptors         |      | Accuracy (%) | 83.3        | 70.8         | 83.3         | 83.3         | <b>91.7</b>  | 83.3         |
|                               |      | AUC          | 0.83        | 0.76         | 0.90         | 0.82         | 0.86         | 0.60         |
| RNA-seq<br>log fold<br>change | 24 h | Accuracy (%) | 75.0        | 75.0         | 79.2         | 79.2         | 75.0         | 66.7         |
|                               |      | AUC          | 0.73        | 0.73         | 0.83         | 0.83         | 0.74         | 0.76         |
|                               | 48 h | Accuracy (%) | 62.5        | 75.0         | 75.0         | 83.3         | 79.2         | 66.7         |
|                               |      | AUC          | 0.71        | 0.73         | 0.78         | 0.66         | 0.61         | 0.79         |
| GGM network<br>coefficient    | 24 h | Accuracy (%) | 83.3        | <b>91.7*</b> | <b>87.5</b>  | 87.5         | 79.2         | <b>91.7</b>  |
|                               |      | AUC          | 0.73        | <b>0.99*</b> | <b>0.91</b>  | 0.83         | 0.76         | <b>0.97*</b> |
|                               | 48 h | Accuracy (%) | 87.5        | 83.3         | <b>91.7*</b> | <b>91.7</b>  | <b>91.7</b>  | 83.3         |
|                               |      | AUC          | <b>0.93</b> | 0.79         | 0.9          | <b>1.00*</b> | <b>1.00*</b> | 0.80         |

p < 0.05

\*p < 0.01

NT, Neurotoxin; HT, Hepatotoxin; CT, Cardiotoxin; GT, Glomerular toxin (Renal toxin); TT, Tubular toxin (Renal toxin); NGC, Non-genotoxic carcinogen

SD, Sample standard deviation; AUC, Area Under the ROC Curve; GGM, Graphical Gaussian Model

Table 2. Summary of prediction performance for KhES-3

|        |      |                   | NT (13) | HT (15) | CT (13) | GT (6) | TT (7) | NGC (9) |
|--------|------|-------------------|---------|---------|---------|--------|--------|---------|
| Random | 24 h | Mean Accuracy (%) | 81.6    | 82.5    | 80.8    | 89.5   | 85.0   | 81.2    |
|        |      | SD                | 3.49    | 3.82    | 4.89    | 2.95   | 4.49   | 5.65    |
|        |      | Mean AUC          | 0.81    | 0.77    | 0.78    | 0.79   | 0.80   | 0.74    |
|        |      | SD                | 0.06    | 0.08    | 0.07    | 0.08   | 0.10   | 0.11    |
|        | 48 h | Mean Accuracy (%) | 81.6    | 82.0    | 80.4    | 88.7   | 86.2   | 81.2    |
|        |      | SD                | 5.27    | 4.82    | 5.21    | 2.03   | 4.43   | 4.04    |
|        |      | Mean AUC          | 0.77    | 0.81    | 0.8     | 0.84   | 0.77   | 0.77    |
|        |      | SD                | 0.09    | 0.05    | 0.07    | 0.10   | 0.13   | 0.08    |

|                         |      |              |              |              |      |              |      |              |
|-------------------------|------|--------------|--------------|--------------|------|--------------|------|--------------|
| GGM network coefficient | 24 h | Accuracy (%) | <b>87.5*</b> | <b>87.5*</b> | 79.2 | 87.5         | 79.2 | <b>91.7*</b> |
|                         |      | AUC          | <b>0.90*</b> | <b>0.85*</b> | 0.81 | <b>0.84</b>  | 0.71 | 0.82         |
|                         | 48 h | Accuracy (%) | <b>91.7*</b> | 83.3         | 79.2 | <b>95.8*</b> | 83.3 | 83.3         |
|                         |      | AUC          | <b>0.99*</b> | <b>0.85</b>  | 0.75 | <b>0.94*</b> | 0.81 | 0.77         |

p< 0.05

\*p< 0.01

NT, Neurotoxin; HT, Hepatotoxin; CT, Cardiotoxin; GT, Glomerular toxin (Renal toxin); TT, Tubular toxin (Renal toxin); NGC, Non-genotoxic carcinogen

SD, Sample standard deviation; AUC, Area Under the ROC Curve; GGM, Graphical Gaussian Model

Table 3. Prediction for HPS4138 cells

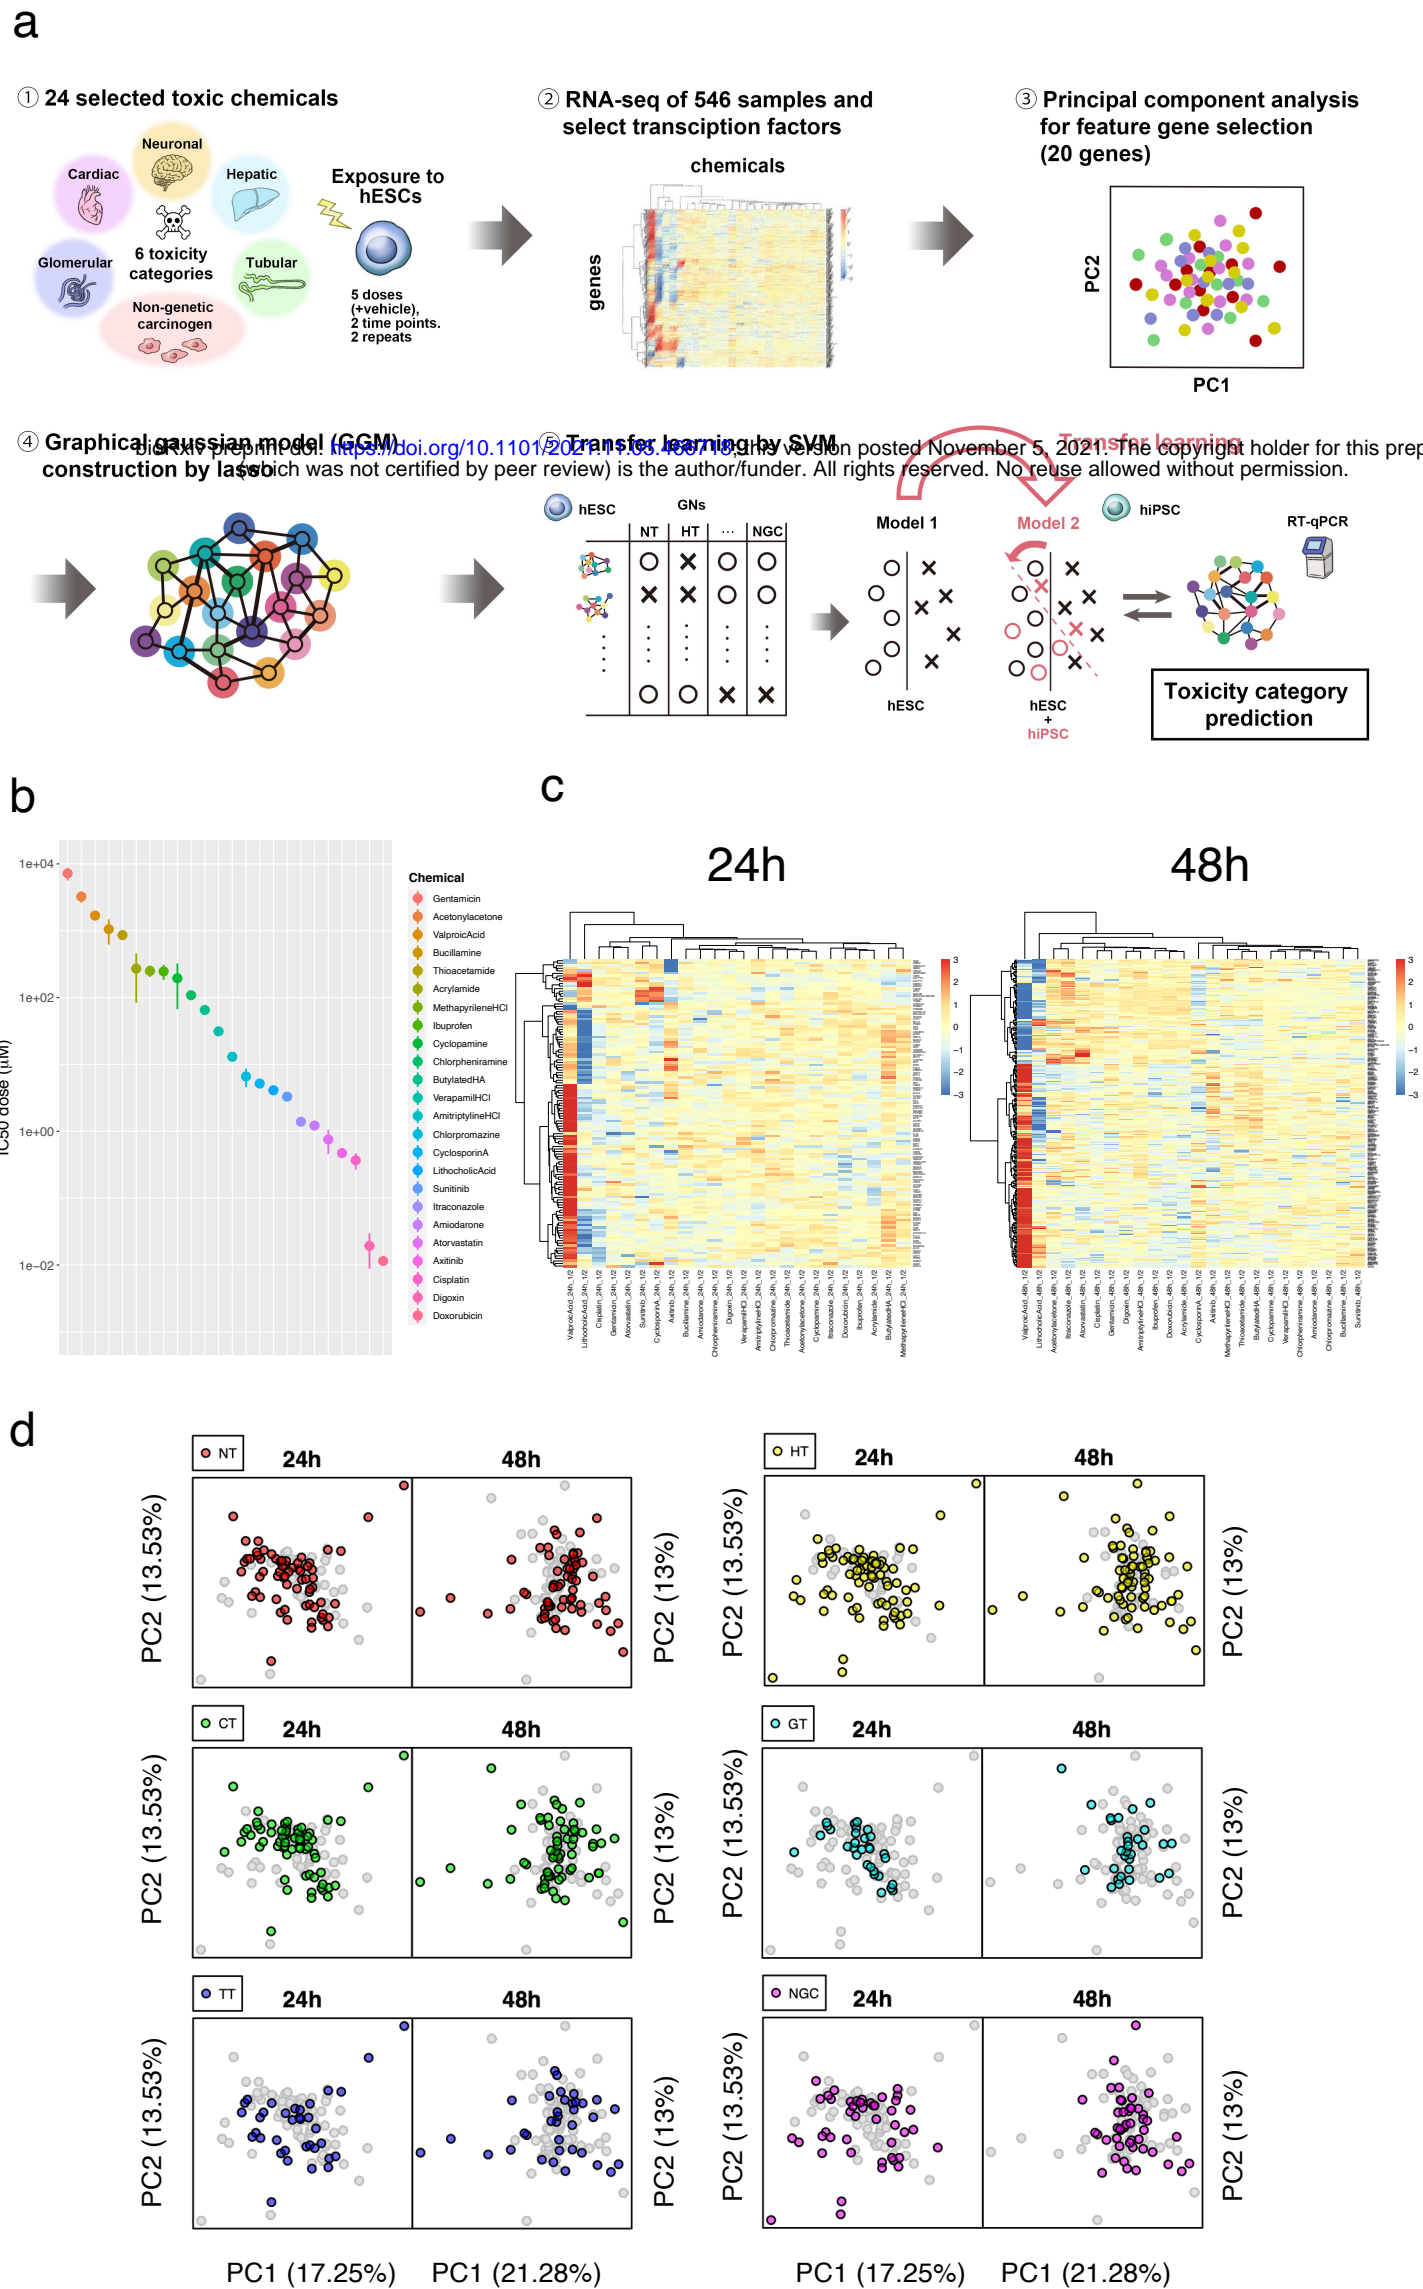

**Fig. 1: Construction of a gene expression database for 24 chemicals**

# a 48h GGM

ValproicAcid

LithocholicAcid

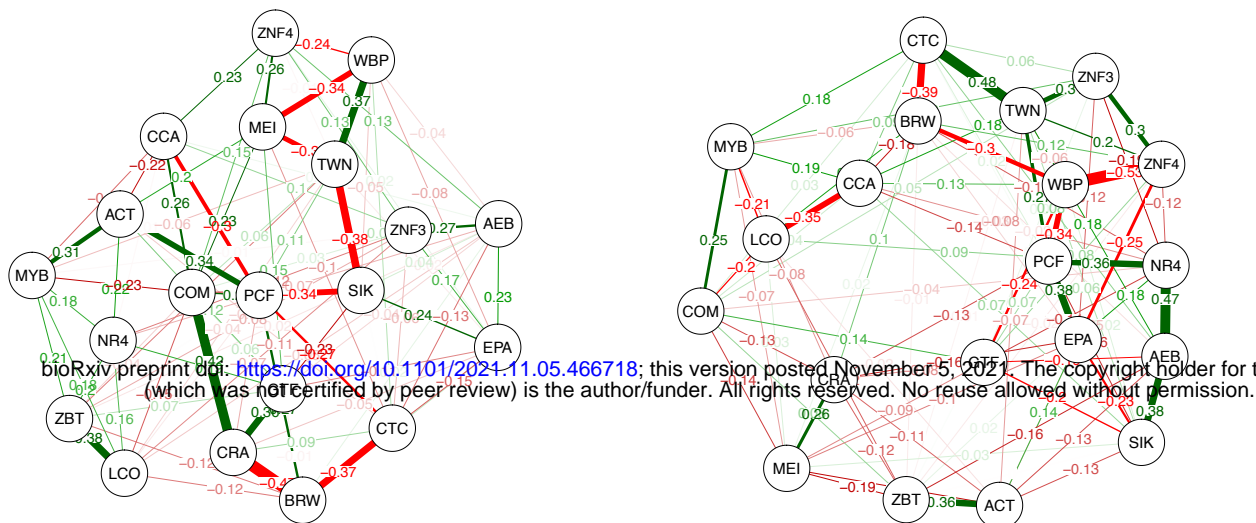

bioRxiv preprint doi: <https://doi.org/10.1101/2021.11.05.466718>; this version posted November 5, 2021. The copyright holder for this preprint (which was not certified by peer review) is the author/funder. All rights reserved. No reuse allowed without permission.

# b HT 24h

# CT 48h

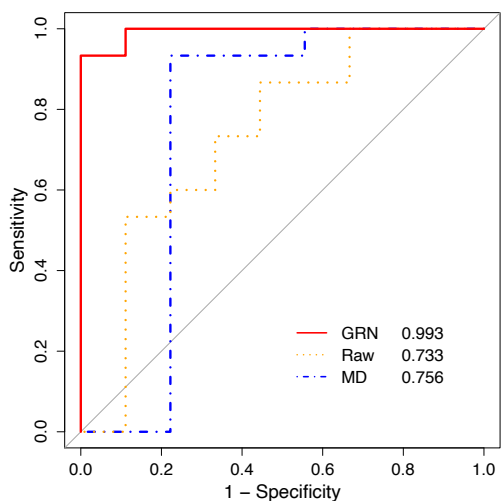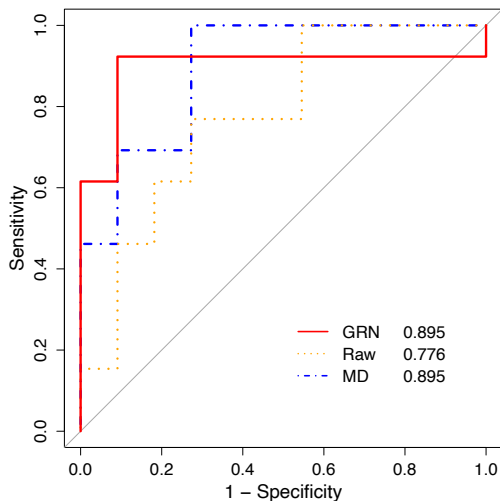

# c

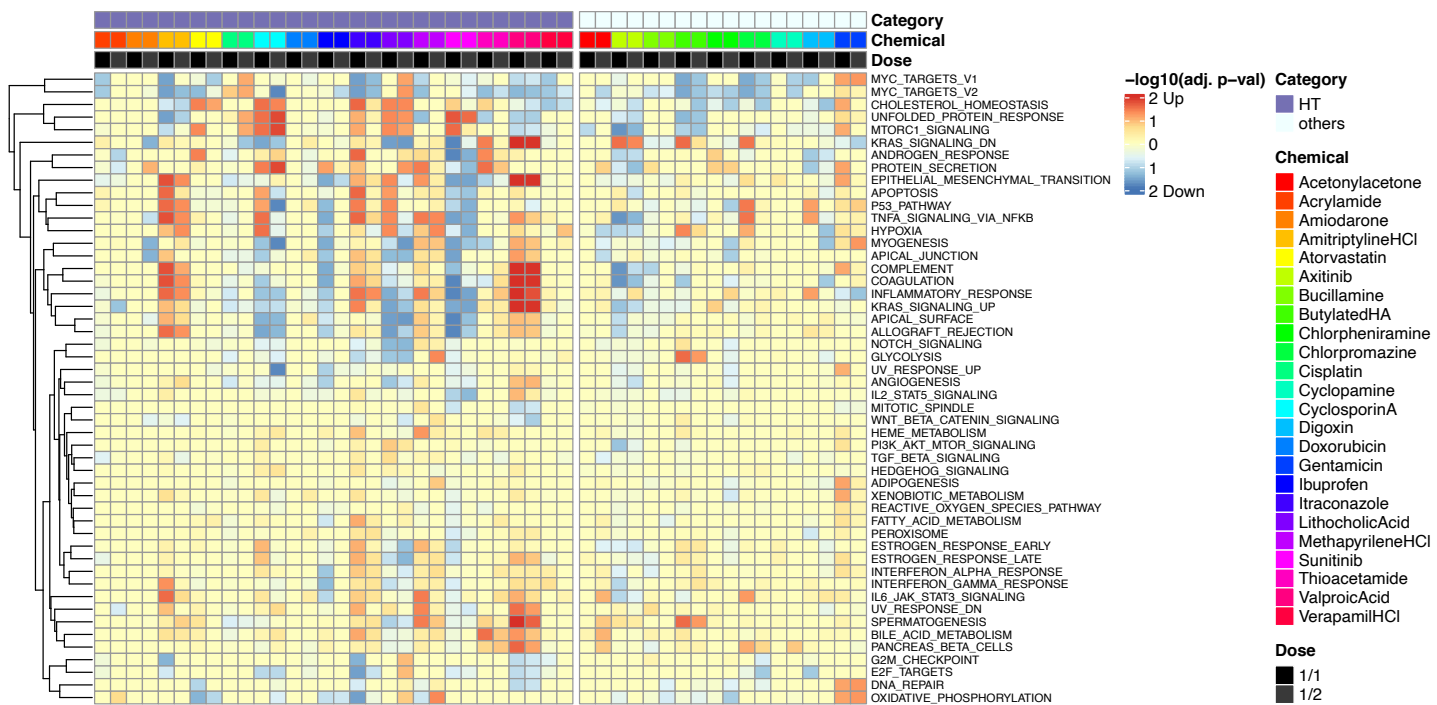

**Fig. 2: Prediction of six toxicity categories using KhES-3 cells**



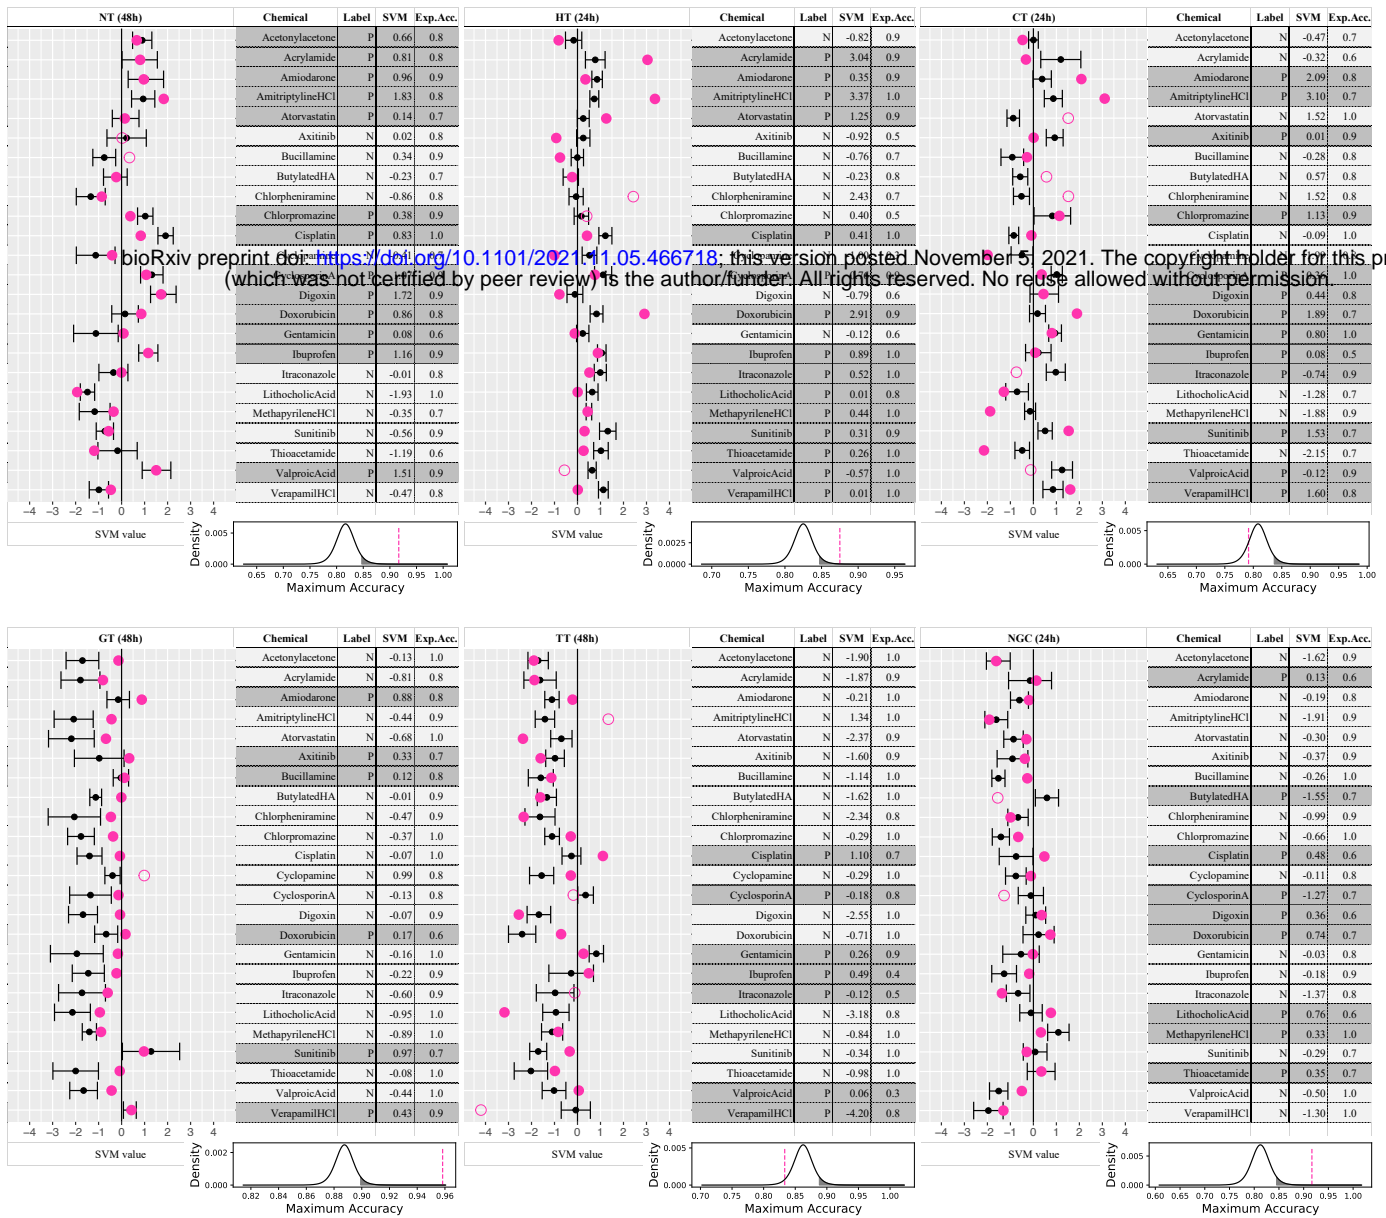

**Fig. 3: Summary of toxicity category prediction for 24 chemicals using HPS4138 cells**
